# Supplementary material for: Oncolytic vesicular stomatitis virus–based cellular vaccine improves triple-negative breast cancer outcome by enhancing natural killer and CD8+ T-cell functionality
Source: PubMed Central journal article supplement — J Immunother Cancer. 2020 Mar 15;8(1):e000465. doi: 10.1136/jitc-2019-000465 (PMC7073779; doi:10.1136/jitc-2019-000465), 2020-03-15
Supplement: jitc-2019-000465supp001.pdf [file jitc-2019-000465supp001.pdf]

Supplementary Table S1

| Mouse FACS antibodies |               | Human FACS antibodies |        |
|-----------------------|---------------|-----------------------|--------|
| Name                  | Clone         | Name                  | Clone  |
| CD122                 | TM- $\beta$ 1 | CD14                  | M5E2   |
| CD69                  | H1.2F3        | CD80                  | L307.4 |
| CD3                   | 145-2C11      | CD86                  | 2331   |
| CD8 $\alpha$          | 53-6.7        | CD163                 | GHI/61 |
| CD4                   | RM4-5         | CD206                 | 19.2   |
| CD80                  | 16-10A1       | HLA-DR                | G46-6  |
| CD86                  | PO3           | CD3                   | HIT3a  |
| CD11c                 | HL3           | CD56                  | B159   |
| IFN $\gamma$          | XMG1.2        | Granzyme B            | GB11   |
| Granzyme B            | NGZB          | CD28                  | 37407  |
| CD107a                | 1D4B          | CD1a                  | HI149  |
| TIM-3                 | 813.2C12      | CD8a                  | SK1    |
| PD-1                  | J43           | CD4                   | SK3    |
| LAG-3                 | C9B7W         | PD-L1                 | MIH1   |
| CTLA-4                | UC10-4B9      |                       |        |
| PD-L1                 | MIH5          |                       |        |

**Cell death markers**

| Name                       | Clone/Company            |
|----------------------------|--------------------------|
| Calreticulin primary       | Abcam 2907               |
| Goat anti-rabbit secondary | Alexa647 Life Technology |
| DAPI                       | Invitrogen               |
| Annexin-V Apoptosis Kit    | CalBiochem               |

**Western blot antibodies, reagents**

| Name                                | Clone/Company        |
|-------------------------------------|----------------------|
| Bafilomycin                         | Sigma B1793          |
| $\beta$ -Actin                      | Sigma AC-74          |
| Parp-1                              | Cell Signaling 9542  |
| Cleaved caspase-3                   | Cell Signaling 9661  |
| LC3A/B                              | Cell Signaling 12741 |
| 2nd Peroxidase $\alpha$ -Rabbit IgG | Jackson              |

**Immunofluorescence antibodies**

| Name                         | Clone/Company        |
|------------------------------|----------------------|
| CD3                          | Sigma CF930          |
| IFN $\gamma$                 | Abcam 9657           |
| Granzyme B                   | Abcam 53097          |
| 2nd $\alpha$ -rabbit IgG     | Cell Signaling 4413s |
| F(ab') <sub>2</sub> Fragment | Cell Signaling 4413  |
