# Supplementary material for: Oncolytic vesicular stomatitis virus–based cellular vaccine improves triple-negative breast cancer outcome by enhancing natural killer and CD8+ T-cell functionality
Source: PubMed Central journal article supplement — J Immunother Cancer. 2020 Mar 15;8(1):e000465. doi: 10.1136/jitc-2019-000465 (PMC7073779; doi:10.1136/jitc-2019-000465), 2020-03-15
Supplement: jitc-2019-000465supp002.pdf [file jitc-2019-000465supp002.pdf]

Supplementary Table S2

**Mouse primers**

| Gene symbol   | Forward primer             | Reverse primer           |
|---------------|----------------------------|--------------------------|
| $\beta$ 2m    | TTCTGGTGCTTGTCTCACTGA      | CAGTATGTTCTGGCTTCCCATT C |
| Ccl2          | GCAGAGAGCCAGACGGG          | ACAGCTTCTTTGGGACACCT     |
| Ccl4          | CAAACCTAACCCCGAGCAA        | TTGGTCAGGAATACCACAGC     |
| Ccl5          | TGCAGAGGACTCTGAGACAGC      | GAGTGGTGTCCGAGCCATA      |
| Csf1          | GACAACACCCCAATGCTAA        | GGTCACCACATCTCGGCTA      |
| Csf2          | TGTCACGTTGAATGAAGAGGT      | GGCTGTCTATGAAATCCGCA     |
| Csf3          | ATGAAGCTAATGGCCCTGC        | TGCAGGAGACCTTGGTAGAG     |
| Cxcl2         | AAAATCATCCAAAAGATACTGAACAA | CTTTGGTCTTCCGTTGAGG      |
| Cxcl10        | CTAGCTCAGGCTCGTCAGTT       | CCCTTGGGAAGATGGTGGTT     |
| Fasl          | CTCCAGGGTCAGTTTTTCCC       | TGTTAAATGGGCCACACTCC     |
| H2-D1         | GTGCTGCAGAGCATTACAAG       | ATGTAAGAGTCAGTGGACGG     |
| H2-K1         | ATACCTGAAGAACGGGAACG       | TCCAAGGACAACCAGAACAG     |
| Ido1          | ACCCAGACACGTTTTTCCAC       | ATGACAACTCACGGACTGG      |
| Ifng          | CCTAGCTCTGAGACAATGAACG     | TTCCACATCTATGCCACTTGAG   |
| Il2           | CCCAGGATGCTCACCTTCAA       | CCGAGAGGTCCAAGTTCAT      |
| Il4           | CGAATGTACCAGGAGCCATATC     | TCTCTGTGGTGTCTTCTGTTG    |
| Il6           | GCTACCAAAGTGGATATAATCAGGA  | CCAGGTAGCTATGGTACTCCAGAA |
| Il10          | CAGAGCCACATGCTCCTAGA       | GTCCAGCTGGTCTTTGTTT      |
| Pdcd1         | GAGCTGGAAGCAAGGACGA        | GAATCTGGTCAAAGAGGCCAA    |
| Ptgs2         | CTCACGAAGGAACTCAGCAC       | GGATTGGAACAGCAAGGATTTG   |
| Tgf $\beta$ 1 | ATACGCCTGAGTGGCTGTCT       | CTGATCCCGTTGATTTCCA      |
| Tnfa          | ATTCGAGTGACAAGCCTGTAG      | AGATAGCAAATCGGCTGACG     |
| Rplp0         | TCTGGAGGGTGTCCGCAAC        | CTTGACCTTTTTCAGTAAGTGG   |

**Human primers**

| Gene symbol    | Forward primer          | Reverse primer          |
|----------------|-------------------------|-------------------------|
| Ccl2           | CATAGCAGCCACCTTCATTC    | GGTCAGCACAGATCTCCTTG    |
| Ccl3           | GCTCTCTGCAACCAGTTCTC    | ACATATTTCTGGACCCACTCC   |
| Ccl4           | CGTGACTGTCCTGTCTCTCC    | GACTTGCTTGCTTCTTTTGG    |
| Ccl5           | TCATTGCTACTGCCCTCTGC    | TCGGGTGACAAAGACGACTG    |
| Ccl8           | GGCTGGAGAGCTACACAAGA    | GACCCATCTCTCCTTGGGGT    |
| Cxcl2          | TGTCTCAACCCCGCATCG      | ACATTAGGCGCAATCCAGGT    |
| Cxcl9          | GGTGTCTTTTCTCTTGGGC     | AACAGCGACCTTTTCTCACT    |
| Cxcl10         | CACTAGCCCCACGTTTTCTG    | GCAGGTACAGCGTACAGTTC    |
| Cxcl10         | TGGGGTAAAAGCAGTGAAG     | TATAAGCCTTGCTTCTCG      |
| Ifn $\alpha$ 1 | AAACTCCCCTGATGAATGCG    | ATAGCAGGGGTGAGAGTCTTTG  |
| Ifn $\beta$    | CAGCAATTTTCAGTGTGAGAAGC | TCATCCTGTCCTTGAGGCAGT   |
| Il6            | GAGTAGTGAGGAACAAGCCAGA  | GGTCAGGGGTGGTTATTGCAT   |
| Irf1           | AGGCTACATGCAGGACTTGG    | GTTGTAGCTTACAGAGGTGGAGG |
| Tap1           | AGATGGCTCAGCCGATACCT    | AATCACTCAGGGTGGACGTG    |
| Tap2           | GAGGAGGCTGCTTACCTAC     | CGCAAGAGCACATTGGCATT    |
| Tnfa           | TCTTCTCCTCCTGATCGTG     | GAGGGTTTGTACAACATGG     |
| Ccl20          | GGTGAAATATATTGTGCGTCTCC | ACTAAACCCTCCATGATGTGC   |
| Ccl22          | TACAGACTGCACTCCTGGTT    | AGCTATAATGGCAGGGAGGT    |
| Cxcl1          | ATCCTGCATCCCCATAGTT     | TGTTGCAGGCTCCTCAGAAA    |

|        |                            |                         |
|--------|----------------------------|-------------------------|
| Cxcl8  | TTCTGCAGCTCTGTGTGAAG       | AAACTTCTCCACAACCCTCTG   |
| Il12a  | CACAGTGGAGGCCTGTTTAC       | GAAGCTTTGCATTCATGGTC    |
| Il12b  | GGAGCTGCTACACTCTCTGC       | TGCCGAGAATTCITTAATGG    |
| Il13   | GACAGCTGGCATGTACTGTG       | CACCTCGATTTTGGTGTCTC    |
| Il10   | ACCAAGACCCAGACATCAAG       | TGGCTTTGTAGATGCCTTTC    |
| Ido1   | AGAGTACCATATTGATGAAGAAGTGG | GTTTAGCAATGAACATCCAGTCA |
| Tgfβ1  | CCTGTGACAGCAGGGATAAC       | GGAGCTGAAGCAATAGTTGG    |
| Ctla-4 | TGCCCAGATTCTGACTTCCT       | AGAATTGCCTCAGCTCTTGG    |
| Gzma   | ATAACCAGGGAAGAGCCAAC       | GTTCTGGTTTCACATCATC     |
| Csf1   | AGTGAAAGTTTGCCTGGGTC       | CATGTGGCTACAGTACTCCG    |
| Csf2   | CATGATGGCCAGCCACTAC        | AAAGGGGATGACAAGCAGAAA   |
| 18s    | AGGAATTGACGGAAGGGCAC       | GGACATCTAAGGGCATCACA    |
