# Supplementary figures and images for: Oncolytic vesicular stomatitis virus–based cellular vaccine improves triple-negative breast cancer outcome by enhancing natural killer and CD8+ T-cell functionality
Source: PubMed Central journal article supplement — J Immunother Cancer. 2020 Mar 15;8(1):e000465. doi: 10.1136/jitc-2019-000465 (PMC7073779; doi:10.1136/jitc-2019-000465), 2020-03-15

Supplementary Figure 1.

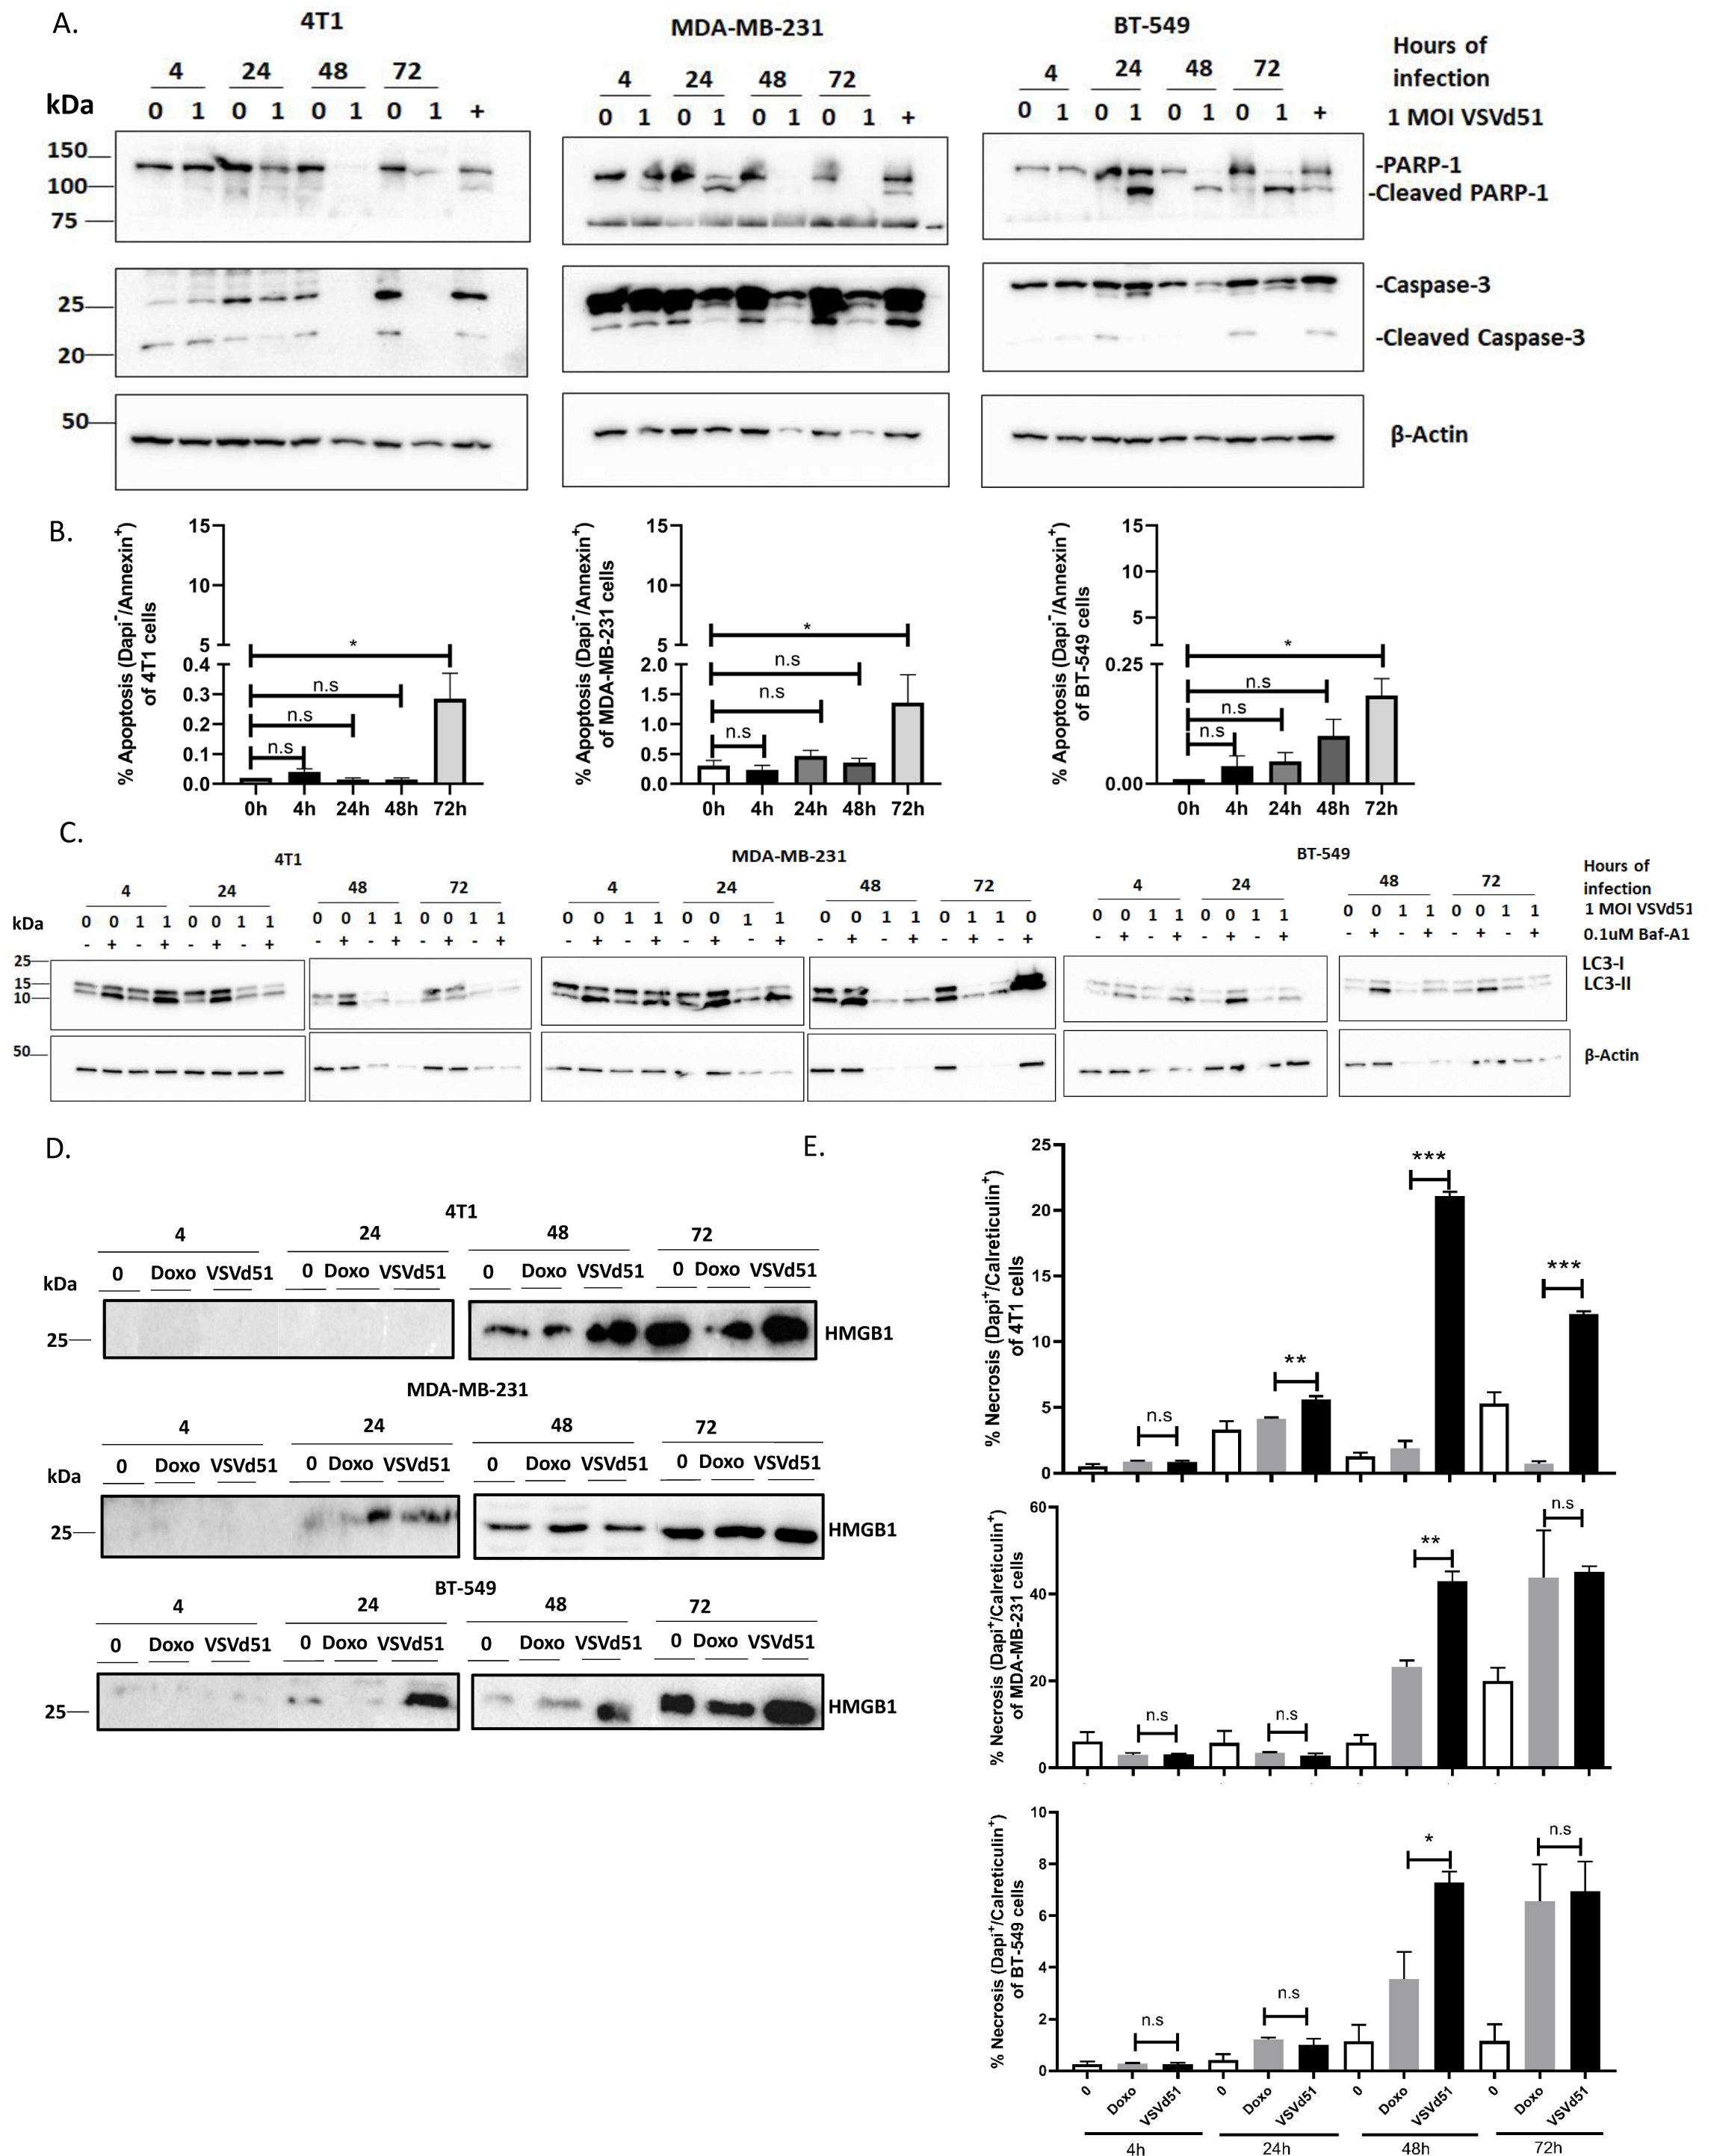

Supplement: jitc-2019-000465supp003.pdf [file jitc-2019-000465supp003.pdf]

## Supplementary Figure 2.

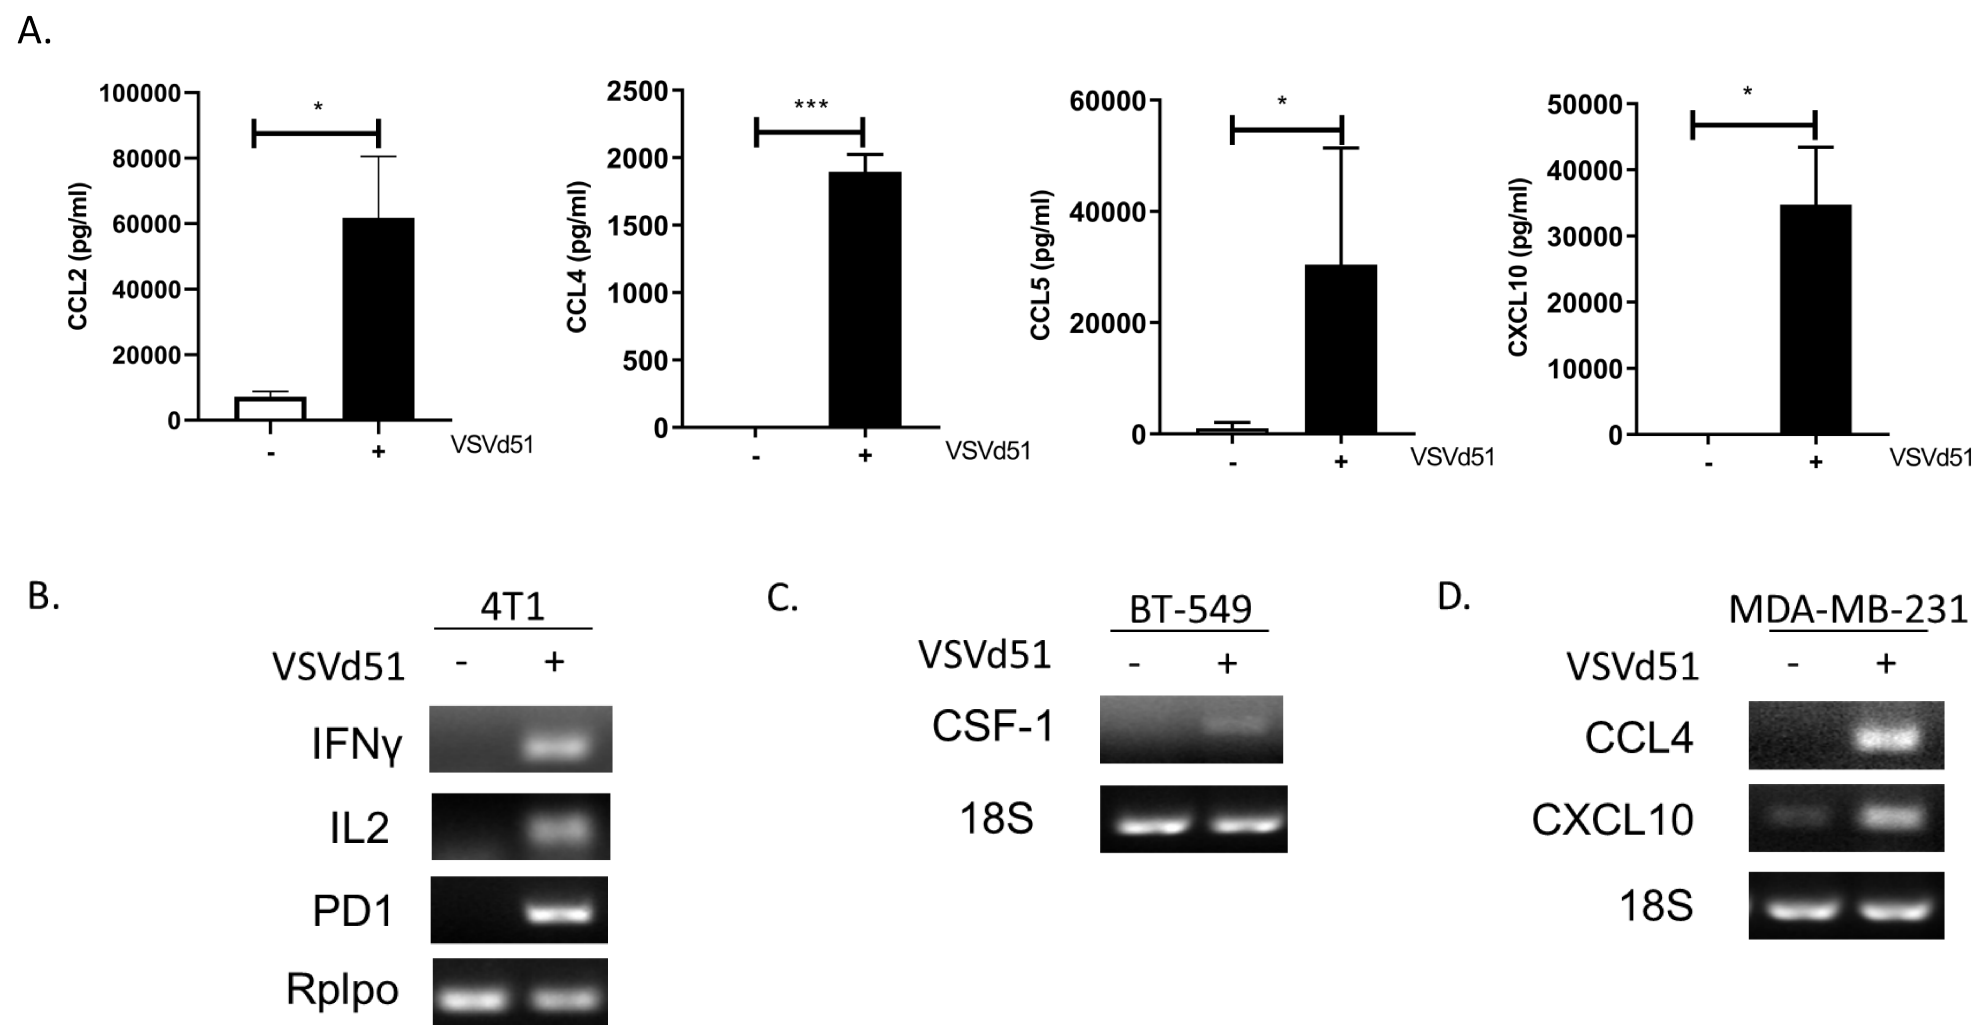

Supplement: jitc-2019-000465supp004.pdf [file jitc-2019-000465supp004.pdf]

## Supplementary Figure 3.

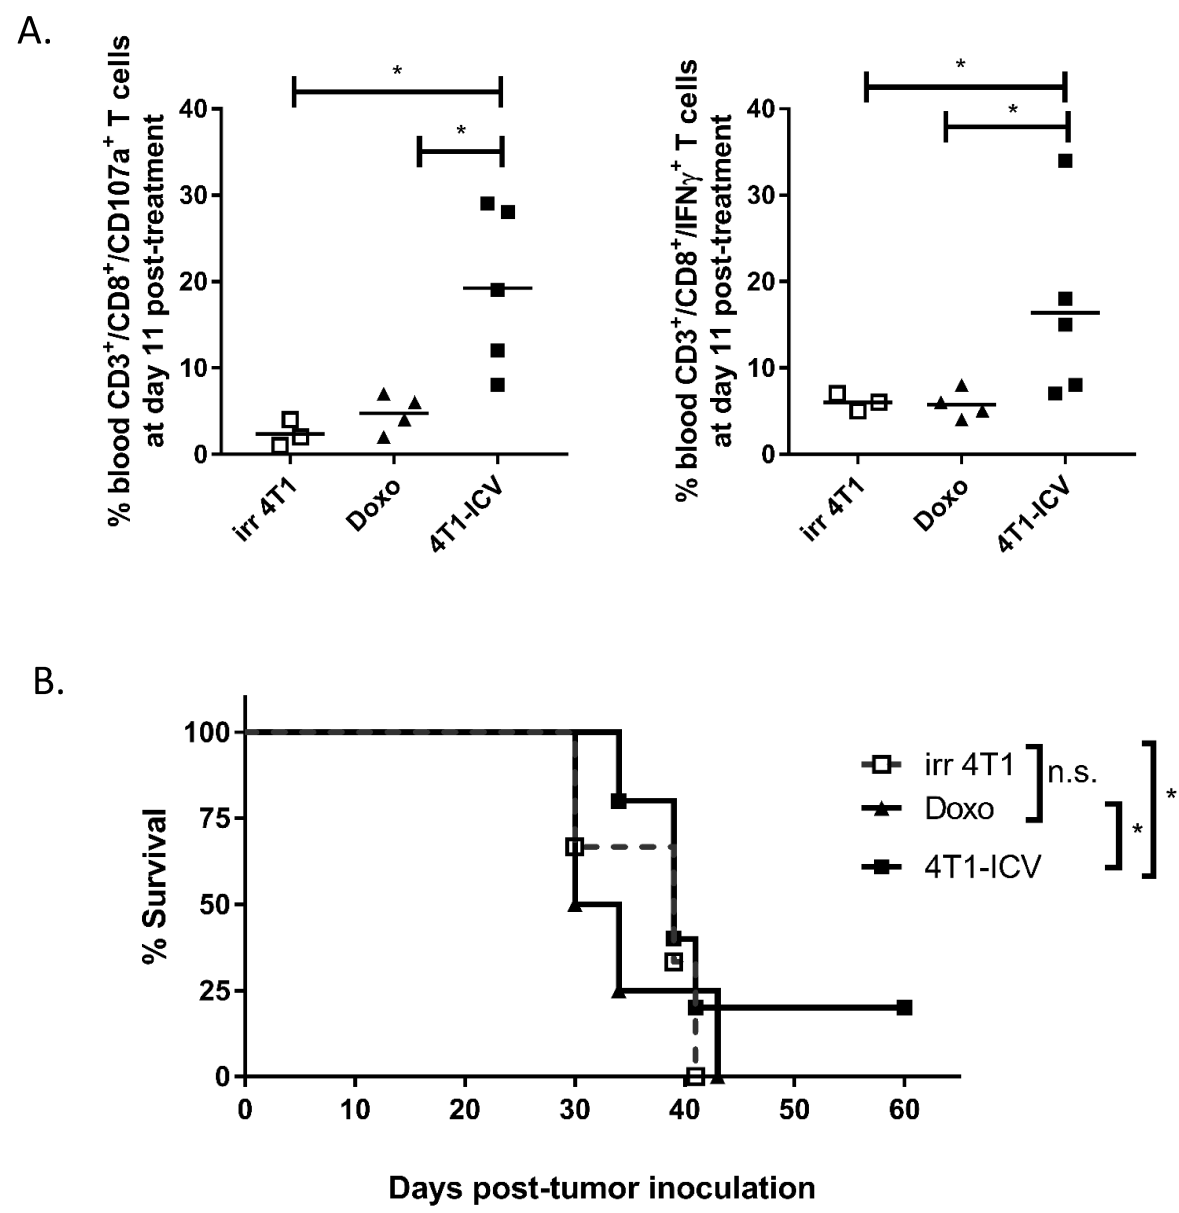

Supplement: jitc-2019-000465supp005.pdf [file jitc-2019-000465supp005.pdf]

**Supplementary Figure 4.**

**A.**

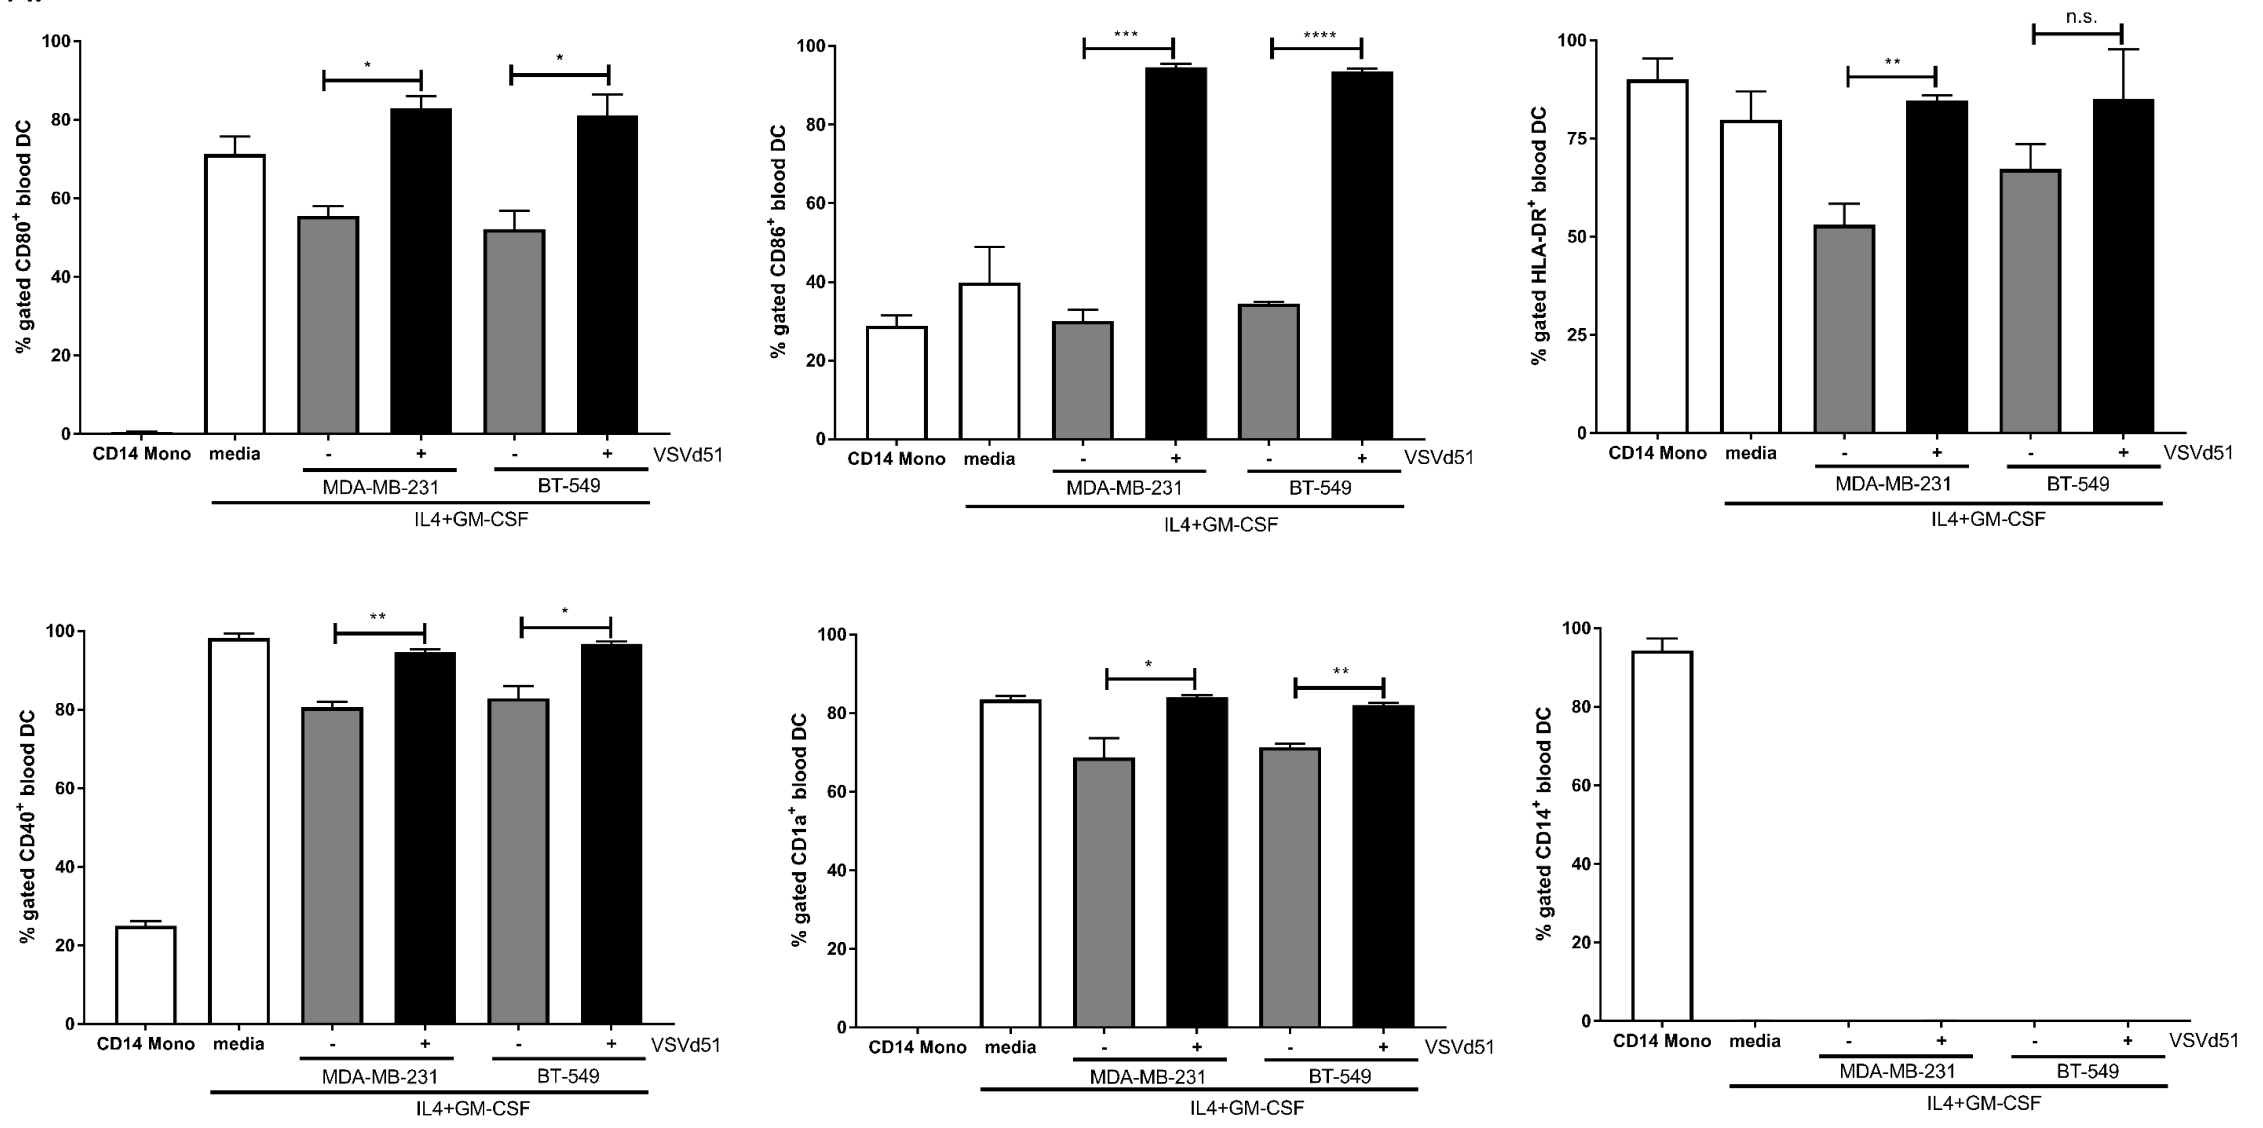

**B.**

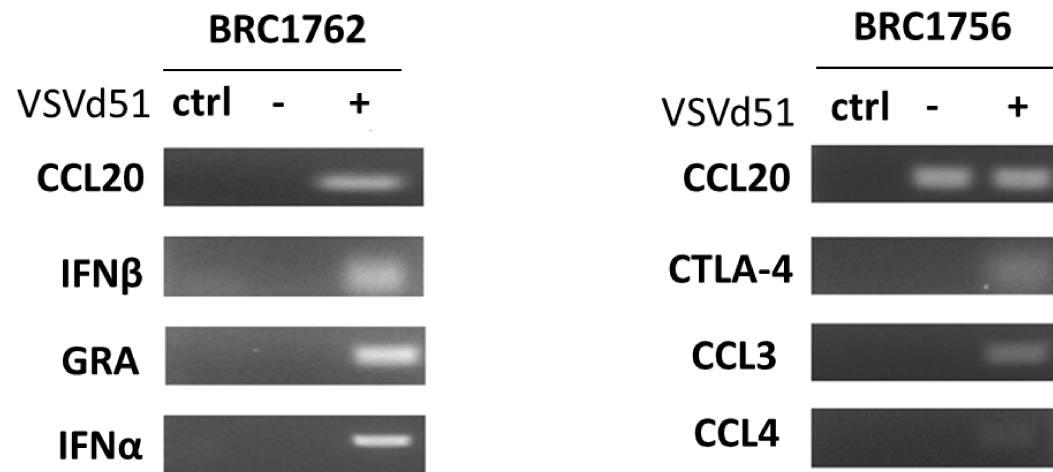

Supplement: jitc-2019-000465supp006.pdf [file jitc-2019-000465supp006.pdf]
